# Supplementary material for: DnaK as Antibiotic Target: Hot Spot Residues Analysis for Differential Inhibition of the Bacterial Protein in Comparison with the Human HSP70
Source: PubMed Central journal article supplement (PMC4408060; doi:10.1371/journal.pone.0124563), 2015-04-23
Supplement: pone.0124563.s001.pdf [file pone.0124563.s001.pdf]

Acinetobacter\_baumannii -----MAKIIIGIDLGTNSCVAVLE-GDKVKVIEAEGARTTPSIIAYK-DGEILVGQSAKRQAVTNPKNTLFAIKRLIGRRYEDQAVQKDIG-LVPYK  
Agrobacterium\_tumefaciens -----MAKVIIGIDLGTNSCVAVMD-GKDTKVIENAEGARTTPSMVAFSDGGERLVGQPAKRQAVTNPTNTLFAVKRLIGRRYEDPTVEKDKA-LVPFE  
Aquifex\_aeolicus ---MAEKKEKIIIGIDLGTNSVSVMM-GDEAVVIQNQEGSRLLTPSVVSWTKEKEILVGEPAKRRAILDPENTVYESKRFIGRKFEE--VKEEAK-RVSYK  
Bacillus\_anthraxis -----MSKIIIGIDLGTNSCVAVME-GGEPKVIIPNPEGNRTPPSVFAFK-NEERQVGEVAKRQAITNPN-TIMSVKRHMGTD-----  
Bacillus\_cereus -----MSKIIIGIDLGTNSCVAVME-GGEPKVIIPNPEGNRTPPSVFAFK-NEERQVGEVAKRQAITNPN-TIMSVKRHMGTD-----  
Bacillus\_subtilis -----MSKVIIGIDLGTNSCVAVLE-GGEPKVIANAEGNRTPPSVFAFK-NGERQVGEVAKRQSAITNPN-TIMSIKRHMGTD-----  
Bacteroides\_thetaiotaomicron -----MGKIIIGIDLGTNSCVAVFE-GNEPVVIANSEGRTPPSVFAFVDGGERKVGDPAKRQAITNPTRTIFSIKRFMGENWDQ--VQKEVT-RVPYK  
Bifidobacterium\_longum -----MARAVGIDLGTNSCIATLE-GGEPVIVNAEGARTTPSVVAFSKSGEILVGEVAKRQAVTNVDRTISSVKRHMGS-----  
Bordetella\_pertussis -----MSKIIIGIDLGTNSCVAVLD-GGQVKIIEAEGARTTPSIVAYMDGETLVGAPAKRQAVANPKNTLYAVKRLIGRKFDEKAVQKID-LMPYS  
Borrelia\_burgdorferi -----MGKIIIGIDLGTNSCVAIME-HGKPVVIQNSEGRTPPSIVAYTNKGERLVGQVAKNQMVNTPENTIYSIKRFMGRRFEE--VASEIK-MVPYK  
Bradyrhizobium\_japonicum -----MGKVIIGIDLGTNSCVAVMD-GKNAKVIENSEGMRTTPSIVAVTDDGERLVGQPAKRQAVTNPERTFFAVKRLIGRRYDDPMVEKDK-LVPYK  
Buchnera\_aphidicola -----MGKIIIGIDLGTNSCVAIMD-GNKPRVLENAEGDRTPSIIAYTQDGEVLVGPAPKRQAITNPKNTLFAIKRLIGRKFDDVEVQDK-IMPYN  
Burkholderia\_pseudomallei -----MGKIIIGIDLGTNSCVAIME-GNQVKVIENSEGARTTPSIIAYMDNEVLVGPAPKRQSAITNPN-TIMSIKRHMGTD-----  
Campylobacter\_jejuni -----MSKVIIGIDLGTNSCVAVYE-RGESKVIIPNKEGKNTTPSVVAFDKEGVLVGSAPKRQAVTNPEKTIYSIKRIMGLMINEDAACEAKN-RLPYH  
Caulobacter\_crescentus -----MSKIIIGIDLGTNSCVAIMD-GKTPKVIENAEGARTTPSVVAFLEDGERLIGQPAKRQAVTNPTNTLFAIKRLIGRTASDPVVEKDKG-MVPYE  
Chlamydia\_trachomatis MSEKRKSNKIIIGIDLGTNSCVSVM-GGQPKVIASSEGRTPPSIVAFK-GGETLVGIAPAKRQAVTNPEKTLASTKRFIGRKFSE--VESEIK-TVPYK  
Chlorobium\_tepidum -----MGKIIIGIDLGTNSCVAVMQ-GTQPTVIENSEGSRTPSMVAFKTKGERLVGQAAKRQAVTNPKNTIFSIKRFMGRKYDE--VPNEKK-LASYD  
Clostridium\_acetobutylicum -----MSKVIIGIDLGTNSCVAVME-GGDPAVIANSEGRTPPSVVSFQKNGERLVGQVAKRQSAITNPKNTIISIKRKMGT-----  
Clostridium\_botulinum -----MAKIIIGIDLGTNSCVSVM-GGEPVVIANAEGSRTPPSVVSFQKNGERLIGQVAKRQSAITNPEKTIISIKRYMGT-----  
Corynebacterium\_glutamicum -----MGRVAVGIDLGTNSVSVLE-GGEPVVIANAEGSRTPPSVFAFKNGEVLVGSAPKNQAVTNVDRTIKRSVKRHIGTD-----  
Coxiella\_burnetii -----MAEIIIGIDLGTNSCVAVME-GGKVRVIEAEGSRTPPSIVAYTKDGEVLVGSAPKRQAVTNADRTLYAIKRLIGRRFDDNVVQKDIK-MVPYK  
Deinococcus\_radiodurans -----MAKAVGIDLGTNSVIAVME-GGREPEVIVNAEGGRTPPSVYAK-GDEILVGIARRQAALNPAATLFEVKRFIARRWDE--VKEEAA-RSPFT  
Desulfovibrio\_vulgaris -----MGKIIIGIDLGTNSCVYVME-GKDPKCIITNPEGGRTPPSVAFD-KERLVGDIAKRQAVTNPERTVFAVKRLMGRRGDAPEVGRWKE-HSPYR  
Dictyoglomus\_turgidum -----MAKIVGIDLGTNSLIAYLE-GRPVVIIPNAEGSRLLTPSIVAFKDGQLLVGEPAKRQAVINAERTIRSIKRHMGTN-----  
Enterococcus\_faecalis -----MSKIIIGIDLGTNSAVALE-GGEAKIIANPEGNRTPPSVVSFK-NGEIQVGEVAKRQAVTNPN-TISSIKRHMGEAG-----  
Escherichia\_coli -----MGKIIIGIDLGTNSCVAIMD-GTTPRVLENAEGDRTPSIIAYTQDGETLVGQPAKRQAVTNPQNTLFAIKRLIGRRFQDEEVQRDVS-IMPYK  
Flavobacterium\_psychrophilum -----MGKIIIGIDLGTNSCVSVM-GQEAVVIIPNAEGKRTTPSIIAFVEGGEIKVGDPAKRQAVTNPTKTVASIKRFMGHSFSE--TTDEAK-RVPYS  
Francisella\_tularensis -----MGKIIIGIDLGTNSCLAIMD-GKTAKVIENAEGHRTTPSVVAYTDSGEILVGAAPKRQAVTNPDNTFFAIKRLIGRKYDDKAVQEDIKKKVPYA  
Fusobacterium\_nucleatum -----MSKIIIGIDLGTNSCVAVME-GGSATIIPNSEGARTTPSVVNIKDNGEVVVGEIAKRQAVTNPTSTVSSIKTHMGS-----  
Geobacter\_sulfurreducens -----MSKVIIGIDLGTNSCVAVME-GGEPVVIANAEGSRTPSMVAFAESGERLVGQQAQRQAVTNPENTLFAIKRLIGRKYDTEVRKDIS-ISPFK  
Gloeobacter\_violaceus -----MGKVVIGIDLGTNSVAVLE-GGQPTVIANEGSRTPPSVVAFTKNHDLVGLQARRQAVLNPENTFYSVKRFIQRKYDE--ITDEAK-QVAYR  
Haemophilus\_influenzae -----MGKIIIGIDLGTNSCVAVMD-GDKARVIEAEGSRTPSIIAYT-DNETLVGQPAKRQAITNPKNTLFAIKRLIGRRFESEEVQRDIK-IMPFE  
Helicobacter\_pylori -----MGKVIIGIDLGTNSAMAVYE-GNEAKIIANKEGKNTTPSIVAFDKEGILVGESAPKRQAVTNPEKTIYSIKRIMGLMFNEDKAKEAEK-RLPYK  
Koribacter\_versatilis -----MAKIIIGIDLGTNSVAVME-GGEPKVIIPNEEGRTTPSVVGFKTKGERLVGQVAKRQAITNPENTIFSIKRFMGRRYNE--VNEEMK-MVPYK  
Lactobacillus\_plantarum ---MASNKIIIGIDLGTNSAVAVLE-GNEPKIITTPEGGRTPPSVFAFK-DGETQVGEVAKRQAITNPN-TVASIKRHMGEAG-----  
Lactococcus\_lactis -----MSKIIIGIDLGTNSAVAVLE-GTESKIIIPNPEGNRTPPSVFAFK-NGEIIVGDAAKRQAVTNPE-TIISIKSKMGT-----  
Leptospira\_interrogans -----MSKEKIIIGIDLGTNSVSVME-GGDPVVIQNSEGARTTPSIVAFKAKGETLIGQFAKNQAITNAVNTIRSAKRFIGRRLNE--CESEMK-HVSYK  
Listeria\_monocytogenes -----MSKIIIGIDLGTNSAVAVLE-GGEAKIIPNPEGARTTPSVVGFK-NGERQVGEVAKRAAITNPN-TISSIKRHMGTN-----  
Mesorplasma\_florum -----MAKERIIGIDLGTNSVVSIME-GGQPIIILENPEGQRTTPSVVAFK-NEDIIVGGAQRQAVTNPN-VVISVKS KMGTN-----  
Moorella\_thermoacetica -----MSKVIIGIDLGTNSCVAVME-GGEAVVIIPNAEGGRTPPSVVAFTKEGERIVGQVAKRQAITNPDRTVISIKRHMGTN-----  
Mycobacterium\_smegmatis -----MARAVGIDLGTNSVAVLE-GGDPVVVANSEGRTPPSVFAFARNGEVLVGPAPKNQAVTNVDRTIKRSVKRHVGT-----  
Mycobacterium\_tuberculosis -----MARAVGIDLGTNSVSVLE-GGDPVVVANSEGRTPPSIVAFARNGEVLVGPAPKNQAVTNVDRTVRSVKRHMGS-----  
Mycoplasma\_mycoides -----MAKEKIIIGIDLGTNSVSVIE-GGQPIIILENPEGQRTTPSVVAFK-NSDIIVGGAQRQAVTNPN-VVQSIKSKMGT-----  
Mycoplasma\_pneumoniae ---MSTDNGLIIGIDLGTNSCVSVM-NGRPVVLENEGKRTTPSIVSYK-NNEIIVGDAAKRQAVTNPN-TIVSIKRLMGTSNKV--T-----  
Neisseria\_gonorrhoeae -----MAKVIIGIDLGTNSCLAISE-NGQTKVIEAEGARTTPSVIAYLDGGEILVGAAPKRQAVTNKNTIYAAKRLIGHKFEDKEVQRDIE-SMPFE  
Neisseria\_meningitidis -----MAKVIIGIDLGTNSCLAISE-NGQTKVIEAEGARTTPSVIAYLDGGEILVGAAPKRQAVTNKNTIYAAKRLIGHKFEDKEVQRDIE-SMPFE  
Pseudomonas\_aeruginosa -----MGKIIIGIDLGTNSCVAILE-NGNVKVIENAEGARTTPSIIAYTNDGETLVGQPAKRQAVTNPQNTLYAVKRLIGRRFEENVVQKDIQ-MVPYS  
Rhodobacter\_sphaeroides -----MAKVIIGIDLGTNSCVAIMD-GAQP RVIENSEGARTTPSIVGFTD-SERLVGQPAKRQAVTNPSNTVFAVKRLIGRRVGDVEKDKK-LVPYS  
Rhodopirellula\_baltica ---MAQGEKIIIGIDLGTNSVVAIME-GSEPKVIIPNPEGRLTPSVVAFDQKQETIVGEPARRQAVTNPKRTVYSAKRFMGRRHNE--VQSEEK-MVPYK  
Rhodospirillum\_rubrum -----MSKVIIGIDLGTNSCVAVMD-GKDVRVIEAEGARTTPSQVAFTESGERLVGQPAKRQAVTNPENTLFAIKRLIGRRYSDPTVEKDKG-LVPYK  
Rickettsia\_prowazekii -----MGKVIIGIDLGTNSCVAVME-GKEPKVIDNAEGERTTPSIIAFAN-SERLVGQPAKRQAVTNPRNTIYAVKRLIGRNFDDPMVRKDQG-LVPYN  
Salinibacter\_ruber -----MGKVIIGIDLGTNSVAVME-GDDEPVIENAEGSRTPSVVAYKDDGERLVGAPAKRQAITNPENTVSSIKRFMGRFYDE--VEDEIE-EVPYE  
Salmonella\_typhimurium -----MGKIIIGIDLGTNSCVAIMD-GTQARVLENAEGDRTPSIIAYTQDGETLVGQPAKRQAVTNPQNTLFAIKRLIGRRFQDEEVQRDVS-IMPYK  
Shewanella\_oneidensis -----MGKIIIGIDLGTNSCVAVLD-GGKARVLENAEGDRTPSIIAYT-DDETIVGQPAKRQAVTNPNNTFFAIKRLIGRRFKDDEVQRDVS-IMPYK  
Shigella\_dysenteriae -----MGKIIIGIDLGTNSCVAIMD-GTTPRVLENAEGDRTPSIIAYTQDGETLVGQPAKRQAVTNPQNTLFAIKRLIGRRFQDEEVQRDVS-IMPYK  
Staphylococcus\_aureus -----MSKIIIGIDLGTNSCVTVLE-GDEPKVIQNPESGRTPPSVFAFK-NGETQVGEVAKRQAITNPN-TVQSIKRMHGT-----  
Streptococcus\_pneumoniae -----MSKIIIGIDLGTNSAVALE-GTESKIIANPEGNRTPPSVVSFK-NGEIIVGDAAKRQAVTNPD-TVISIKSKMGT-----  
Streptomyces\_coelicolor -----MARAVGIDLGTNSVSVLE-GGEPVIVTNAEGARTTPSVVAFKNGEVLVGEVAKRQAVTNVDRTIKRSVKRHMGT-----  
Synechocystis\_sp. -----MGKVVIGIDLGTNSCVAVME-GGKPTVIANAEGRTPPSVVGAKNGDRLVGIQAKRQAVMNPNTFYSVKRFIQRKFDE--ITNEAT-EVAYS  
Thermodesulfovibrio\_yellowstonii -----MGKAIIGIDLGTNSVAVVV-GGEPVVIIPNPEGQRTTPSVVAFDKEGGERLVGQVAKRQAITNPENTIFSIKRLMGRKYSQEVQEA--RLPYK  
Thermotoga\_maritima ---MAEKKEFVIGIDLGTNSVIAWMPDGTVEVIPNAEGSRVTPSVVAFKSGEILVGEPAKRQAVMILNPERTIKSIKRMHGT-----  
Thermus\_thermophilus -----MAKAVGIDLGTNSVIAVLE-GGKPVVLENAEGERTTPSVVAFR-DGETLVGMAKRQAVLNPEGTIFEIKRFIARRFEE--VQEEAK-RVPYK  
Vibrio\_cholerae -----MGKIIIGIDLGTNSCVAVLD-GDKPRVIEAEGERTTPSVIAYT-DGETLVGQPAKRQAVTNPQNTLFAIKRLIGRRFEDEEVQRDIK-IMPYK  
Xanthomonas\_campestris -----MGKIIIGIDLGTNSCVAIMD-GGKARVIEAEGDRTPSIVAYTKDGEVLVGSAPKRQAVTNPKNTFYAVKRLIGRKFDDVEVQKDIS-HVPYK  
Yersinia\_pestis -----MGKIIIGIDLGTNSCVAIMD-GTKARVLENAEGDRTPSIIAYTQDGETLVGQPAKRQAVTNPQNTLFAIKRLIGRRFQDEEAQRDKD-IMPYK

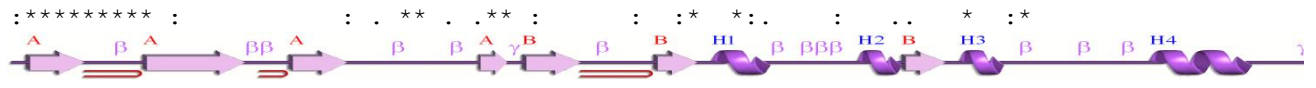

Acinetobacter\_baumannii  
 Agrobacterium\_tumefaciens  
 Aquifex\_aeolicus  
 Bacillus\_anthraxis  
 Bacillus\_cereus  
 Bacillus\_subtilis  
 Bacteroides\_thetaiotaomicron  
 Bifidobacterium\_longum  
 Bordetella\_pertussis  
 Borrelia\_burgdorferi  
 Bradyrhizobium\_japonicum  
 Buchnera\_aphidicola  
 Burkholderia\_pseudomallei  
 Campylobacter\_jejuni  
 Caulobacter\_crescentus  
 Chlamydia\_trachomatis  
 Chlorobium\_tepidum  
 Clostridium\_acetobutylicum  
 Clostridium\_botulinum  
 Corynebacterium\_glutamicum  
 Coxiella\_burnetii  
 Deinococcus\_radiodurans  
 Desulfovibrio\_vulgaris  
 Dictyoglomus\_turgidum  
 Enterococcus\_faecalis  
 Escherichia\_coli  
 Flavobacterium\_psychrophilum  
 Francisella\_tularensis  
 Fusobacterium\_nucleatum  
 Geobacter\_sulfurreducens  
 Gloebacter\_violaceus  
 Haemophilus\_influenzae  
 Helicobacter\_pylori  
 Koribacter\_versatilis  
 Lactobacillus\_plantarum  
 Lactococcus\_lactis  
 Leptospira\_interrogans  
 Listeria\_monocytogenes  
 Mesoplasma\_florum  
 Moorella\_thermoacetica  
 Mycobacterium\_smegmatis  
 Mycobacterium\_tuberculosis  
 Mycoplasma\_mycoides  
 Mycoplasma\_pneumoniae  
 Neisseria\_gonorrhoeae  
 Neisseria\_meningitidis  
 Pseudomonas\_aeruginosa  
 Rhodobacter\_sphaeroides  
 Rhodopirellula\_baltica  
 Rhodospirillum\_rubrum  
 Rickettsia\_prowazekii  
 Salinibacter\_ruber  
 Salmonella\_typhimurium  
 Shewanella\_oneidensis  
 Shigella\_dysenteriae  
 Staphylococcus\_aureus  
 Streptococcus\_pneumoniae  
 Streptomyces\_coelicolor  
 Synechocystis\_sp.  
 Thermodesulfovibrio\_yellowstonii  
 Thermotoga\_maritima  
 Thermus\_thermophilus  
 Vibrio\_cholerae  
 Xanthomonas\_campestris  
 Yersinia\_pestis

I IKADNGDAW--VEVN-----DKKLAPQQISAEILKMKKTAEDYLGETVTEAVITVPAYFNDAQRQATKDAGKIAGLDVKRIINEPTAAALAFGMDKK-  
 IVKGDNGDAW--VKAQ-----DKNYSPSQISAMILQKMKETAESYLGEKVEKAVITVPAYFNDAQRQATKDAGRIAGLDVLRINEPTAAALAYGLDKK-  
 VVPDEKGDAAFDPINA-----GKLVRPPEVGAHVLRKLEAAEAFGLGEPVKKAVITVPAYFNERQRQATKDAGKIAGLEVVRILNEPTAAAMAYGLHKK-  
 -----YKVEVE-----GKDYTPQEISAILQNLKASAEAYLGETVTKAVITVPAYFNDAERQATKDAGRIAGLEVERINEPTAAALAYGLEKQ-  
 -----YKVEVE-----GKDYTPQEISAILQNLKASAEAYLGETVTKAVITVPAYFNDAERQATKDAGRIAGLEVERINEPTAAALAYGLEKQ-  
 -----YKVEIE-----GKDYTPQEVSAILQHLKSYAESYLGETVSKAVITVPAYFNDAERQATKDAGKIAGLEVERINEPTAAALAYGLDKT-  
 VVKGDNNTPR--VDID-----GRLYTPQEISAMILQKMKKTAEDYLGQEVTEAVITVPAYFSDSQRQATKEAGQIAGLEVKRIVNEPTAAALAYGLDKA-  
 -----WTVDID-----GKKWTPQEISAQILMMLKRDAAEAYLGEVPTDAVITCPAYFNDAQRQATKDAGKIAGLNVLRIINEPTAAALAYGLEKG-  
 IVKADNGDAW--VEVR-----GKKLAPPQVSAEVLKMKKTAEDYLGEEVTEAVITVPAYFNDSQRQATKDAGRIAGLEVKRINEPTAAALAFGLDCKTE  
 IEKGLNGDAR--VNISN---IKKQMSPEISAAATLTKMKETAESYLGEKVEAVITVPAYFNDAQRQATKDAGKIAGLEVKRIVNEPTAAALAYGIEKK-  
 IVKASNGDAW--VEAD-----GQYSPSQVSAFYLQKMKETAEAHLGQKVDQAVITVPAYFNDAQRQATKDAGKIAGLEVLRINEPTAAALAYGLDKT-  
 IVNSDNGDAW--IDVK-----KQMAPPQISAEVLKMKKTAEDYLGETIKEAVITVPAYFNDAQRQATKDAGRIAGLEVKRINEPTAAALAYGLDKG-  
 I IKADNGDAW--VEAH-----GKLVRPPEVGAHVLRKLEAAEAFGLGEPVKKAVITVPAYFNDAERQATKDAGKIAGLEVVRILNEPTAAALAYGLDKE-  
 ITE-RNGACA--IEIA-----GKIYTPQEISAKVLMKLEDAEAFGLGESVTEAVITVPAYFNDAQRQATKEAGTIAGLNVLRIINEPTSAALAYGLDCKD  
 IVKGPTGDAW--VKAH-----GKDYSPEVSAFYLQKMKEEAAEHLGEPVTKAVITVPAYFNDAQRQATKDAGKIAGLEVLRINEPTAAALAYGLDKN-  
 VAPNSKGDV--FDVE-----QKLYTPEEIGAQILMMLKETAESYLGETVTEAVITVPAYFNDSQRASATKDAGRIAGLDVKRIIPEPTAAALAYGIDKE-  
 VVNE--GGYAK--VKIG-----DKYSPQEISAMILQKMKQTAEDFLGEPVTEAVITVPAYFNDAQRQATKDAGKIAGLEVKRINEPTAAALAYGLDCK-  
 -----EKVAID-----DKNYTPQEISAMILQKMLKADAAYLGETVTEAVITVPAYFNDSQRQATKDAGKIAGLEVLRINEPTAASLAYGLDKM-  
 -----HKVNID-----STEYTPQOISAMVLQKLLKADAAYLGEKVTQAVITVPAYFNDSQRQATKDAGKIAGLEVLRINEPTAASLAYGLDKM-  
 -----WSVAID-----DKNYTSQEISARTLMMLKRDAAEAYLGEDVTEAVITVPAYFEDSQRQATKEAGQIAGLNVLRIINEPTAAALAYGLEKG-  
 I IKADNGDAW--VEVKDKGKSGKLAPPQISAOVLKMKKTAEDYLGHEVKDAVITVPAYFNDSQRQATKDAGKIAGLNVLRIINEPTAAALAYGMDKK-  
 VKEGPGSVR--IEVN-----GKDLAPEQVSAEVLKLVSDASAKLGNKTDVAVITVPAYFNDSQREATRQAGEIAGLNVLRIINEPTAAALAYGLERK-  
 IVAGANGDAA--VEVQ-----GRPYSAPEISAMILGKLLKADAAYLGETVTEAVITVPAYFNDAQRQATKDAGRIAGLDVKRIINEPTAASLAYGFDRK-  
 -----YKVKID-----DKYTPQEISAMILRKLKRDAAEAYLGEKIEKAVITVPAYFSDAQRQATKDAGAIAGLEVVRINEPTAAALAYGLDKE-  
 -----YKVDVE-----GKSYTPQEVSAMILQYLKGFADYLGKVEKAVITVPAYFNDAQRQATKDAGKIAGLEVLRINEPTAAALAYGLDKT-  
 IIAADNGDAW--VEVK-----GQMAPPQISAEVLKMKKTAEDYLGEVTEAVITVPAYFNDAQRQATKDAGRIAGLEVVRINEPTAAALAYGLDKG-  
 VVKGDNNTPR--VDID-----GRLYTAQELSAMTLQKMKKTAEDYLGQVTEAVITVPAYFNDAQRQATKEAGEIAGLKMRIINEPTAAALAYGLDCK-  
 VIKADNGDAW--VATK-----EGKKMAPPQVSAEVLKMKKTAEDYLGEVTEAVITVPAYFNDSQRQATKDAGKIAGLEVKRINEPTAAALAYGVDSK-  
 -----YKVEIF-----GKKYTPQEISAKTLQKLLKADAAYLGEVVEKAVITVPAYFTDSQRQATKDAGTIAGLDVKRIINEPTAAALAYGLEKK-  
 IVKADNGDAW--VEAR-----GKMSAPEISAMVLQKMKQTAEDYLGETVTEAVITVPAYFNDSQRQATKDAGKIAGLNVLRIINEPTAAALAYGLDCK-  
 VVRDGS--NVKLHSTNE---DKDFAPEEISALVLRKLVDDASKYLGEKVTQAVITVPAYFNDSQRQATKDAGRIAGLEVLRINEPTAAALAYGLDCK-  
 ITRADNGDAW--VNVK-----GDKLAPPQISAEVLKMKKTAEDFLGEPVTEAVITVPAYFNDAQRQATKDAGKIAGLDVKRIINEPTAAALAFGLGSS-  
 IVD-RNGACA--IEIS-----GKVTTPQEISAKILMMLKLEDAESYLGESVTEAVITVPAYFNDSQRQATKEAGTIAGLNVLRIINEPTSAALAYGLDCKE  
 VQQAGD-HVA--VLAQ-----GKEYSPAESAYILQKLLKAAEDYLGETVTEAVITVPAYFNDAQRQATKDAGKIAGLDVKRIINEPTAAALAYGLDCK-  
 -----YKVSIE-----GKDYTPQOISAMILQYIKGFAEDYLGDTVEKAVVITVPAYFNDAQRQATKDAGKIAGLNRIINEPTAAALAYGLDKT-  
 -----EKVSAN-----GKEYTPQEISAMILQNLKATAEAYLGEKVEKAVITVPAYFNDAQRQATKDAGKIAGLEVERINEPTAAALAYGLDKT-  
 VIRSGNEGK--FETS-----AGEFTPQEISARVLMKMKQTAEDYLGQKVTKAVITVPAYFNDEQRQATKDAGRIAGLEVERINEPTAAALAYGFDDK-  
 -----YKETIE-----GKDYSPQEISAILQYLKSYAEDYLGETVTKAVITVPAYFNDAQRQATKDAGKIAGLEVERINEPTAAALAYGMDKT-  
 -----EKIDIN-----GKKYTPQEISAILRYMKKYAEKVGKTKAVITVPAYFNDSQRQATKDAGKIAGLDVERINEPTAAALAYGLEKK-  
 -----YKVKID-----NKEYTPQEISAMILQKLLKADAAYLGEKVTQAVITVPAYFTDSQRQATKDAGRIAGLEVLRINEPTAASLAYGLDKG-  
 -----WNIID-----DKKYTPQEISARVLMMLKRDAAESYLGEDITDAVITVPAYFNDAQRQATKEAGQIAGLNVLRIINEPTAAALAYGLDKG-  
 -----WSIID-----GKKYTAPEISARILMMLKRDAAEAYLGEDITDAVITTPAYFNDAQRQATKDAGQIAGLNVLRIINEPTAAALAYGLDKG-  
 -----SKVNLE-----GKDYSPEQISAEILRYMKNYAEAKLGQVTKAVITVPAYFNDAQRQATKDAGTIAGLQVERINEPTAAALAYGLDKQ-  
 -V-----KNPDGS-----TKELTPEEVSQAQILSYLKYAEKIKGKTSRAVITVPAYFNDAERNATKTAGKIAGLNVERINEPTAAALAYGIDKS-  
 I IKADNGDAW--VKAQ-----GKELSPQOISAEVLKMKKETAESYLGEKVEKAVITVPAYFNDSQRQATKDAGRIAGLDVKRIINEPTAAALAFGMDKGD  
 I IKANNDAW--VKAQ-----GKELSPQOISAEVLKMKKETAESYLGEKVEKAVITVPAYFNDSQRQATKDAGRIAGLDVKRIINEPTAAALAFGMDKGD  
 IVKADNGDAW--VEVK-----GQKMAPPQISAEVLKMKKTAEDYLGEVTEAVITVPAYFNDSQRQATKDAGRIAGLDVKRIINEPTAAALAYGLDKA-  
 IVNGGNGDAW--VEVR-----GKYSPPQISAFYLQKMKETAESYLGESVTEAVITVPAYFNDAQRQATKDAGKIAGLEVLRINEPTAAALAYGLDCK-  
 ITGGPGDY--VKIQVG-----DSEYTPQEISAKVLRKLESAESYLGHKVNKAVITVPAYFNDAQRQATKDAGQIAGLEVARIINEPTAAALAYGLDCK-  
 IVKGDNGDAW--VQTR-----DEKYAPSQLSAFYLQKMKETAEAHLGEPVTEAVITVPAYFNDSQRQATKDAGKIAGLEVLRINEPTAAALAYGMDKK-  
 IVKADNGDAW--VEAD-----NHKYSPPQISAFYLQKMKETAESYLGEKVTQAVITVPAYFNDAQRQATKDAGKIAGLEVLRINEPTAAALAYGFESK-  
 VVRGENDTAR--VQIG-----DRKYTPQEISAVVLQKLLKQTAEDYLGQEVTEAVITVPAYFNDAQRQATKEAGEIAGLNVRINEPTAASLAYGLDDE-  
 IIGADNGDAW--LDVK-----GQKMAPPQISAEVLKMKKTAEDYLGEVTEAVITVPAYFNDAQRQATKDAGRIAGLEVVRINEPTAAALAYGLDKE-  
 IIAADNGDAW--VESR-----GNKMAPPQVSAEILKMKKTAEDFLGEEVTEAVITVPAYFNDSQRQATKDAGRIAGLEVVRINEPTAAALAYGIDKK-  
 IIAADNGDAW--VEVK-----GQKMAPPQISAEVLKMKKTAEDYLGEVTEAVITVPAYFNDAQRQATKDAGRIAGLEVVRINEPTAAALAYGLDKG-  
 -----YKVDIE-----GKSYTPQEISAMILQNLKNTAESYLGEKVDKAVITVPAYFNDAERQATKDAGKIAGLEVERINEPTAAALAYGLDKT-  
 -----EKVSAN-----GKEYTPQEISAMILQYLKGYAEDYLGEKVTKAVITVPAYFNDAQRQATKDAGKIAGLEVERINEPTAAALAYGLDKT-  
 -----WKNLID-----GKDFNPQOISAFVLQKLLKRDAAESYLGEKVTQAVITVPAYFNDAERQATKEAGEIAGLNVLRIINEPTAAALAYGLDKD-  
 VVKDGNGNVKLDCAQ-----GKQFAPEEISAOVLKMLKADAAYLGEKVTQAVITVPAYFNDSQRQATKDAGKIAGLEVLRINEPTAASLAYGLDCK-  
 IVEAPNGDAH--VEIM-----GKRYSPPEISAMILQKLLKQAAEDYLGEVTEAVITVPAYFDDSRQATKDAGRIAGLNVLRIINEPTAAALAYGLDCK-  
 -----YKVRID-----DKYTPQEISAFILKMLKADAAYLGGEEKKAVITCPAYFNDAQRQATKEAGIAGLEVLRINEPTAAALAYGLDKA-  
 VVPGPDGGVR--VEVK-----GKLYTPEEISAMILRKLVEDASKLGEKTKAVITVPAYFNDAQRQATKEAGIAGLEVLRINEPTAAALAYGLDCK-  
 IVKADNGDAW--VEAK-----GQKMAAPQVSAEVLKMKKTAEDFLGEPVTEAVITVPAYFNDAQRQATKDAGRIAGLEVVRINEPTAAALAYGLDKQ-  
 IIAADNGDAW--VQTS-----DSKRMAPPQISARVLMKMKTAEDFLGEPVTEAVITVPAYFNDAQRQATKDAGRIAGLDVKRIINEPTAAALAYGLDKN-  
 IIAADNGDAW--LEVK-----GQKMAPPQISAEVLKMKKTAEDYLGEVTEAVITVPAYFNDAQRQATKDAGRIAGLEVVRINEPTAAALAYGLDKE-

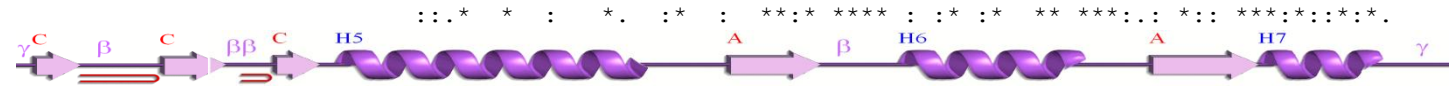







Acinetobacter\_baumannii  
Agrobacterium\_tumefaciens  
Aquifex\_aeolicus  
Bacillus\_anthraxis  
Bacillus\_cereus  
Bacillus\_subtilis  
Bacteroides\_thetaiotaomicron  
Bifidobacterium\_longum  
Bordetella\_pertussis  
Borrelia\_burgdorferi  
Bradyrhizobium\_japonicum  
Buchnera\_aphidicola  
Burkholderia\_pseudomallei  
Campylobacter\_jejuni  
Caulobacter\_crescentus  
Chlamydia\_trachomatis  
Chlorobium\_tepidum  
Clostridium\_acetobutylicum  
Clostridium\_botulinum  
Corynebacterium\_glutamicum  
Coxiella\_burnetii  
Deinococcus\_radiodurans  
Desulfovibrio\_vulgaris  
Dictyoglomus\_turgidum  
Enterococcus\_faecalis  
Escherichia\_coli  
Flavobacterium\_psychrophilum  
Francisella\_tularensis  
Fusobacterium\_nucleatum  
Geobacter\_sulfurreducens  
Gloeobacter\_violaceus  
Haemophilus\_influenzae  
Helicobacter\_pylori  
Koribacter\_versatilis  
Lactobacillus\_plantarum  
Lactococcus\_lactis  
Leptospira\_interrogans  
Listeria\_monocytogenes  
Mycoplasma\_florum  
Moorella\_thermoacetica  
Mycobacterium\_smegmatis  
Mycobacterium\_tuberculosis  
Mycoplasma\_mycoides  
Mycoplasma\_pneumoniae  
Neisseria\_gonorrhoeae  
Neisseria\_meningitidis  
Pseudomonas\_aeruginosa  
Rhodobacter\_sphaeroides  
Rhodopirellula\_baltica  
Rhodospirillum\_rubrum  
Rickettsia\_prowazekii  
Salinibacter\_ruber  
Salmonella\_typhimurium  
Shewanella\_oneidensis  
Shigella\_dysenteriae  
Staphylococcus\_aureus  
Streptococcus\_pneumoniae  
Streptomyces\_coelicolor  
Synechocystis\_sp.  
Thermodesulfovibrio\_yellowstonii  
Thermotoga\_maritima  
Thermus\_thermophilus  
Vibrio\_cholerae  
Xanthomonas\_campestris  
Yersinia\_pestis

GAAIQGAVLSGD----KNDVLLLDVTPPLTLGIETMGGVLTPIIEKNTTIPAKKSQVVFSTAADNQPAVDISVYQGERKMAQQNKLKGNFQLGDI PPAPRGV  
GAAIQAGVLQGD----VKDVL LLDVTPPLSLGIETLGGVFTRLIDRNTTIP TKKSQVFSTAE DNQS AVTIRV SQGEREMAQDNKLLGQFDLVGLPPSPRGV  
GAAIQAGVLAGE----VKEIVLV DVTPLSLG VETVYGGVMTVLI PRNTPI PVRKCEIFTTAHDYQTEVEI HVLQGERPLAKDNKSLAKFYLTGI PPAPRGV  
GAAVQGGVLTGD----VEGVLLLDVTPPLSLGIETMGGVFTKLIERN TTIPTSKS QVFSTAADNQPAVDI HVLQGERPMSADNKT LGRFQLTDLPPAPRGI  
GAAIQGGVLTGD----VKDVLLLDVTPPLSLGIETMGGVFTKLI DRNTTIP TKKSQVFSTAADNQTAVDI HVLQGERPMSADNKT LGRFQLTDI PPAPRGV  
GAAVQGAVLTDE----IKGVLLLDVTPPLSMGIETLGGVMTKLI DANNTI PARKSETFSTAADNQSEV TIHVLQGERPMAAQNKSIGQFNLSGI APARRGV  
GAAVQSGVIKGD----RKDVLLLDVTPPLSLGIETKGGIMTKLI DRNTAIP TKRSEVVFSTAE DNQPSVLI QVYQGEREFARDNKPLGT FELTGI APARRGV  
GAAIQGSVLSGE----RKDVLLLDVTPPLSLGIETLGGVMTKMI QKNTTIP TRYSQVFSTAE DNQPAVT IKVFQGERE IAAGNKGLGEFNLEGI PPAPRGL  
GAAIQGGILTGE----TKDMVLLDVTPLSLGIETLGGVMTKLI ERNTTIP TKKSQVFSTAE DNQTSVD IKVLQGEREMAQNRILGNFILDGI PAAPRGV  
GAAIQAGVLQGD----VKDVL LLDVTPPLSLGIETLGGVFTRI IDRNTTIP TKKSQVFSTAE DNQNAVT IRVFQGEREMAADNKMLGQFDLMGI PPAPRGM  
GAAVQGGVLSGD----VKDVLLLDVTPPLSLGIETMGGIMTSLINKNTTIP TKHSQVFSTAE DNQSAVT IHVLQGERKRSSDNKSLGQFNLDGINPAPRGT  
GAAIQGGVLSGD----RKDVLLLDVTPPLSLGIETLGGVMTKLI AKNTTIP TKHAQVYSTAE DNQSAVT IKVFQGEREMAQNKLLGFEFNLEGI PPAPRGV  
GAAIQGAVIKGD----VKDVL LLDVTPPLSLGIETLGGVMTKII EKGTIPTTKKEQVFSTAE DNQSAVT INVLQGEREF SRDNKSLGNFNLEGI PPAPRGM  
GAAVQAGVLQGD----VKDVL LLDVTPPLTLGIETLGGVFTPLI ERNTTIP TKRSQVFSTAE DNQSAVT IRVFQGERPMAQDNKMLGQFDLVGI PPAPRGV  
GAAIQGGVLTGE----VKDVL LLDVTPPLSLGIETLGGVMTPLV ERNTTIP TQKKQIFSTAE DNQPAVT IVVLQGERPMAKDNEIGRFDLTDI PPAPRGH  
GAAIQGGVLTGD----VTDVL LLDVTPPLSLGIETLGGVMTKLI EANNTI PTKRQEIFSTAE DNQTSVEVHVLQGERPMA SDNKT LGRFHLSDI PPAPRGV  
GAAIQAGVLTGE----VKDVL LLDVSPPLTLGIETLGGVATPLI ERNTTIP TRKSQVFSTAE DNQPSVE INIVQGERKMAADNKSLGRFQLTLDGI APARRGV  
GAAIQAGVLTDG----VKDVLLLDVTPPLTLGIETFGVSTPLI EKNTTIP TRKSQVFSTAE DNQTSVE IHVYQGER SMAADNKT LGRFTLSGI APARRGI  
GAAIQAGVLRGE----VKDVLLLDVTPPLSLGIETKGGVMTKLI ERNTTIP TKRSEFTTAE DNQPSVQIQVFQGERE IATANKLLGS FELGGI APARRGV  
GAAIQGAVLSGE----VKDVL LLDVTPPLSLGIETLGGVMTKLI EKNTTIP TKANQVFSTAE DNQTA VTVHVLQGEREMASANKSLGRFDLSDI PPAPRGV  
GAAVQAGIIQGD---SSLGDIVLV DVTPLTLGV EKVGGMIAPMT TRNTTVP AKKTEIYTTA ENNQPGVE INVLQGERPMAADNKSLGRFKLEGI PMPAPGR  
GAAIQGGILAGD----VKDVL LLDVTPPLSLGIETLGGVFTRLI ERNTTIP TRKSQVFSTAE DNQPSVS IHVLQGERPMA SDNMT LGRFELTGI PPAMRGV  
GAAIQAGVIGGE----IRDIVLV DVTPLSLGIETLGGVFTKI IERN TTIPTVKSQVIFTTAADYQTSVE IHVLQGERALAKDNISLGRFILDGI PPAPRGV  
GAAIQGGVITGD----VKDVLLLDVTPPLSLGIETMGGVFTKLI DRNTTIP TSKSQVFSTAE DNQPAVDI HVLQGERPMAADNKTLGRFQLTDI PAAPRGV  
GAAVQGGVLTGD----VKDVLLLDVTPPLSLGIETMGGVMTPLI AKNTTIP TKHSQVFSTAE DNQSAVT IHVLQGERKRAADNKSLGQFNLDGINPAPRGM  
GAAIQGGVLSGD----VKDVL LLDVTPPLSLGIETMGGVMTILIE SNTTIP TKKSQIFSTAE ADSQPTVELHVLQGERAMAVDNKT IGRFNLDGI PPAPRGV  
GAAIQGGVLADG----VKDIL LLDVTPPLSLGIETMGGVMTKLI ERNTTIP TKKSQVFSTAE DNQPAVT IHVLQGEREMASANKSLGRFDLADI PPAPRGM  
GAAIQGGVLMGD----VKDVL LLDVTPPLSLGIETLGGVFTKMI EKNTTIP VKKSQVYSTAE VDNQPAVT INVLQGERS RATTDNHKLGE FNLEGI PAAPRGV  
GAAIQGGVLRGD----VKDVL LLDVTPPLSLGIETLGSVMTKLI EKNTTIP CRKSQVFSTAE SDNQPAVT IHVLQGEREMAI DNKT LGNFELTGI PPAPRGV  
GAAIQAGVLSGE----VRDVLLLDVTPPLSLGVETLGGVATPI IPRNTTIP TRKSETFSTAE DNQTSVE IHVYQGER SMAADNKSLGRFRLDGI PPAPRGV  
GAAVQGGVLTGD----VKDVLLLDVTPPLSLGIETMGGVMTPLI EKNTTIP TRKSQVFSTAE DNQSAVT IHVLQGERKRAADNKSLGRFNLLDGINPAPRGM  
GASIQGGVTKGD----VKDVLLLDVTPPLSLGIETLGGVMTKVI DRGTTIP AKKSQVFSTAE DNQPAVS IMVLQGERE LARDNKSLGKFDLQGI APARRGV  
GAAIQGGVTKGE----VKDLL LLDVTPPLTL SIE TLGGVATPMI PRNTTIP TKTETFSTAE DNQNSVE IHVLQGERPMAQGNRTL GKFH TLGLPPAPRGV  
GAAVQGGVITGD----VKDVLLLDVTPPLSLGIETMGGVFTKLI DRNTTIP TSKSQVFSTAE DNQPAVDI HVLQGERPMAADNKTLGRFQLTDI PAAPRGV  
GAAIQGGVITGD----VKDVLLLDVTPPLSLGIETMGGVFTKLI DRNTTIP TSKSQVFSTAE DNQPAVDI HVLQGERPMAADNKTLGRFQLTDI PAAPRGI  
GAAIQGGVITGD----VSDVLLLDVTPPLSLGIETLGGVMTKLI ERNTTIP TKKSQVFSTAE DNQSAVS IHVLQGEREMASANRTLGRFDLIGI PPAPRGV  
GAAIQGGVITGD----VKDVLLLDVTPPLSLGIETMGGVMTPLI ERNTTIP TSKSQVFSTAE DNQPAVDI HVLQGERPMAADNKTLGRFQLADI PPAPRGI  
GAAIQGGVLAGD----VTDVLLLDVTPPLSLGIETMGGVMTKLI DRNTTIP TEKSQIFSTAE VDNQPAVD INVLQGERPMAADNKSLGQFQLTDI GKPPAKGT  
GAAIQGGVLAGE----VKDVL LLDVTPPLSLGIETLGGVFTKLI ERNTTIP TSKSQIFSTAE DNQTTVE IHVLQGERAMAADNKTLGRFQLTGI PPAPRGV  
GAAIQAGVTKGE----VKDVL LLDVTPPLSLGIETKGGVMTKLI ERNTTIP TKRSEFTTAE DNQPSVQIQVYQGERE IASHNKLKGS FELTGI PPAPRGV  
GAAIQAGVTKGE----VKDVL LLDVTPPLSLGIETKGGVMTPLI ERNTTIP TKRSEFTTAE DNQPSVQIQVYQGERE IAAHNKLKGS FELTGI PPAPRGI  
GAAVQGGVLAGE----VTDI LLDVTPPLSLGIETMGGVMTKLI ERNTTIP AKRTQIFSTAE DNQPAVD INVLQGERAMAADNKSLGQFQLTDI QPAPRGV  
GAAIQGGVLRGD----VKDVL LLDVTPPLTL SIE TLGGVATPLI KRNTTIP VKSQVIFSTAE DNQSAVD VVVCQGERPMAADNKSLGRFNLDGI QPAPKPKG  
GAAIQGGEVLSGG----RSDVLLLDVTPPLSLGIETMGGVMTKLI QKNTTIP TKASQVFSTAE DNQSAVT IHVLQGERERASANKSLGQFNLDGI APARRGM  
GAAIQGGEVLSGG----RSDVLLLDVTPPLSLGIETMGGVMTKLI QKNTTIP TKASQVFSTAE DNQSAVT IHVLQGERERASANKSLGQFNLDGI APARRGM  
GAAIQGAVLAGD----VKDVL LLDVTPPLTLGIETLGGVMTGLIE KNTTIP TKKSQVFSTAE DNQSAVT IHVLQGERKQAAQNKSLGKFDLADI PPAPRGV  
GAAIQAGVLQGD----VKDVLLLDVTPPLSLGIETLGGVFTRLI DRNTTIP TKKSQVFSTAE DNQNAVT IRVFQGEREMAADNKLLGQFNLEDI PPAPRGM  
GAAIQGSVLAGD----RNDVLLLDVTPPLTLGIETEGGVM TALV ERNTTIP PAEKKNVVFSTAE DNQTA VTVRVFQGERKMANANRLLAE FNLEDI PAAPRGV  
GAAIQGGVTKGD----VKDVL LLDVTPPLSLGIETLGGVFTRLI DRNTTIP TRKSQVFSTAE DSQTA VTVRVFQGEREMAADNKMLGQFDLVGLPSAPRGV  
GAAIQGGVTKGE----VTDI LLDVTPPLSLGIETLGGVFTRLI DRNTTIP SKSQVFSTAE DNQTA VTVRVFQGEREMAADNKMLGQFNLDGI PPAPRGV  
GAAVQGGVLSGD----VDDVLLLDVTPPLNLGIETLGGVMTPLI EANNTI PTKESVVFSTAE DNQTSVEVHVLQGDREMAKDNRTLGRFHLDGI PPAPRGT  
GAAVQGGVLTGD----VKDVL LLDVTPPLSLGIETMGGVMTPLI TNNTTIP TKHSQVFSTAE DNQSAVT IHVLQGERKRAADNKSLGQFNLDGINPAPRGM  
GAAIQAGVLSGD----VKDVL LLDVTPPLSLGIETMGSVMTKLI EKNTTIP TKAQVVFSTAE DNQSAVT IHVLQGERKQASANKSLGQFNLDGI EPAPRGM  
GAAVQGGVLTGD----VKDVL LLDVTPPLSLGIETMGGVMTPLI AKNTTIP TKHSQVFSTAE DNQSAVT IHVLQGERKRAADNKSLGQFNLDGINPAPRGM  
GAAIQGGVITGD----VKDVLLLDVTPPLSLGIEILGGRMNTLIERNTTIP TSKSQIYSTAE VDNQPSVDVHVLQGERPMAADNKTLGRFQLTDI PPAERGK  
GAAIQGGVITGD----VKDVLLLDVTPPLSLGIETMGGVFTKLI DRNTTIP TSKSQVFSTAE DNQPAVDI HVLQGERPMAADNKTLGRFQLTDI PAAPRGI  
GAAIQAGVTKGE----VKDVLLLDVTPPLSLGIETKGGIMTKLI ERNTTIP TKRSEFTTAE DNQPSVQIQVYQGERE IAAYNKKLGNFELTGLPPAPRGV  
GAAIQGGVLSGE----VKDIL LLDVSPPLSLGVETLGGVMTKII IPRNTTIP TKSSETFSTAE VDGQSNVE IHVLQGEREMANDNKSLGTFRLDGI PPAPRGV  
GAAIQAAILKGE----VKEVLLLDVTPPLSLGIETLGGVFTKII ERNTTIP TKKSQIFTTAE DNQTA VTIKVYQGEREMAADNKLLGVFELVGI PPAPRGI  
GAAIQAAIAGTEGAKGRDIVLV DVTPLTLGIE VKGGFLFEPI IPRNTKIPVRKSKIFTTVEDGQTEVE IRVYQGERPIARENIFLGSFKLVGI PPAPRGV  
GAAIQAGVLMGE----VRDVLLLDVTPPLSLGVETKGGVMTVLI PRNTTIP TRKCEIFTTAEHNTAVE IHVLQGERPMAQDNKSLGRFRLEGI PMPAPGV  
GAAVQGGVLAGE----VKDVL LLDVTPPLSLGIETMGGVMTKLI EKNTTIP TKANQVFSTAE DNQSAVT IHVLQGERKQAMYNKSLGQFNLDGINPAPRGM  
GAAIQGGVLAGD----VKDVL LLDVTPPLSLGIETMGGVFTKII EKNTTIP TKASQVFSTAE DNQSAVT VHV LQGEREQARFNKSLAKFNLDSGIEPAPRGM  
GAAVQGGVLSGE----VKDVL LLDVTPPLSLGIETMGGVMTPLI TNNTTIP TKKSQVFSTAE DNQSAVT IHVLQGERKRAQDNKSLGQFNLDGI QPAPRGM

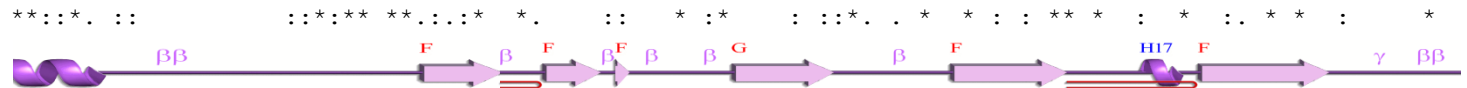

\*\*::\*. ::                    ::\*:\*\* \*\*.::\*   \* .                    ::                    \* : \*                    : :\*. . \* \* : : \*\* \*   : \*   . \* \*   :   \*

Acinetobacter\_baumannii  
 Agrobacterium\_tumefaciens  
 Aquifex\_aeolicus  
 Bacillus\_anthraxis  
 Bacillus\_cereus  
 Bacillus\_subtilis  
 Bacteroides\_thetaiotaomicron  
 Bifidobacterium\_longum  
 Bordetella\_pertussis  
 Borrelia\_burgdorferi  
 Bradyrhizobium\_japonicum  
 Buchnera\_aphidicola  
 Burkholderia\_pseudomallei  
 Campylobacter\_jejuni  
 Caulobacter\_crescentus  
 Chlamydia\_trachomatis  
 Chlorobium\_tepidum  
 Clostridium\_acetobutylicum  
 Clostridium\_botulinum  
 Corynebacterium\_glutamicum  
 Coxiella\_burnetii  
 Deinococcus\_radiodurans  
 Desulfovibrio\_vulgaris  
 Dictyoglomus\_turgidum  
 Enterococcus\_faecalis  
 Escherichia\_coli  
 Flavobacterium\_psychrophilum  
 Francisella\_tularensis  
 Fusobacterium\_nucleatum  
 Geobacter\_sulfurreducens  
 Gloebacter\_violaceus  
 Haemophilus\_influenzae  
 Helicobacter\_pylori  
 Koribacter\_versatilis  
 Lactobacillus\_plantarum  
 Lactococcus\_lactis  
 Leptospira\_interrogans  
 Listeria\_monocytogenes  
 Mesoplasma\_florum  
 Moorella\_thermoacetica  
 Mycobacterium\_smegmatis  
 Mycobacterium\_tuberculosis  
 Mycoplasma\_mycoides  
 Mycoplasma\_pneumoniae  
 Neisseria\_gonorrhoeae  
 Neisseria\_meningitidis  
 Pseudomonas\_aeruginosa  
 Rhodobacter\_sphaeroides  
 Rhodopirellula\_baltica  
 Rhodospirillum\_rubrum  
 Rickettsia\_prowazekii  
 Salinibacter\_ruber  
 Salmonella\_typhimurium  
 Shewanella\_oneidensis  
 Shigella\_dysenteriae  
 Staphylococcus\_aureus  
 Streptococcus\_pneumoniae  
 Streptomyces\_coelicolor  
 Synechocystis\_sp.  
 Thermodesulfovibrio\_yellowstonii  
 Thermotoga\_maritima  
 Thermus\_thermophilus  
 Vibrio\_cholerae  
 Xanthomonas\_campestris  
 Yersinia\_pestis

PQIEVFSFDINADGILKVSADKSTGKEQSIQIKANSGLSDAEIEAMIKDAEANAEEEDRKFEEELAKARNEADALISSSNKAVKDLGDK-----VTEDE  
 PQIEVTFDDIDANGIVQVSADKGTGKEQQIRIQASGGLSDADIEKMKVDAEANAADKRRRAGVEAKNQAESLIHSTEKSVKEYGDK-----VSETD  
 PKIEVCFDIDADGILHVTAKDLGTGKEQSVRVEISSGLTPEEIERIIEKEAEEHAEEDRKKKELIEAKNQDLHLVYQLEKALKEAGDK-----VPADV  
 PQIEVTFDDIDANGIVNVRADLGTGKEQAIITIQSSSGLSDEEVERMVQEAANAADADQKRKEEVELLRNEADQLVFQTDKVVKDLGDK-----VDAAE  
 PQIEVTFDDIDANGIVNVRADLGTGKEQAIITIQSSSGLSDEEVERMVQEAANAADADQKRKEEVELLRNEADQLVFQTDKVVKDLGDK-----VDAAE  
 PQIEVFSFDIDKNGIVNVRADLGTGKEQNIITIKSSSGLSDEEIERMVKDAEANAADADAKKKEIEVRNEADQLVFQTEKTLKDLGDK-----VDEEQ  
 PQIEVTFDDIDANGILKVSADKATGKEQAIRIEASSGLSKEEIEKMKAEAEANAADKKEEREKIDKLNQADSIVFQTENQLKELGDK-----LPADK  
 PQIEVTFDDIDANGIVHVSADKGTGKEQSMITITGGSSGLPKDEIDRMVKEAEAAHEADKRRKEDAEETRNQAEAFAYSTEKLVNDNKDK-----LSDDI  
 PQIEVTFDDIDANGILHVSADKGTGKENKITIKANSGLSEDEIQRMVKDAEANAEDHRLAELAQAARNQADALVHATRKSLTEYGEK-----LEAAE  
 PQIEVFSFDIDANGIVHVSADKMTGKEQKIRIESSSGLSESEIDRMVKDAEAAHEEDKLLKENIEAKNTANSLIYQTEKSLKEYSEK-----ISSED  
 PQIEVTFDDIDANGIVNVSADKATGKEQKIRIQASGGLSEADIEKMKVDAEANAADKRRREAVTAKNEADGLVHSTEKALAEHGSK-----VAETE  
 AQIEVTFDDIDSGILHVSADKDKTGTGKEQKITIKASSGLNEEIEKMMVDAEANAEDKQFEEELIQRNQGDLVHSEIKKQLNENKNS-----IEEES  
 PQIEVTFDDIDANGILHVGAKDKATGKENKITIKANSGLSEAEIEKMKVDAEANAADHKLRELAESRNQGDALVHSTKKALTEYGDK-----LEAGE  
 PQIEVTFDDIDANGILTVSADKATGKAQEIKITGSSSGLSEEEINMMVDAELHKEEDKRRKEAVDARNADS LAHQVEKSLSELGDK-----VAAAD  
 PQIEVTFDDIDANGIVQVHAKDKATNKEQSIQIQANGGLSDSIDERMVKEAEANKAADEKKKQLVEAKNQEAAILHSTEKALAEHGDK-----VGAAE  
 PQIEVTFDDIDANGILHVSADKDAASGREQKIRIEASSGLKEDEIQQMIRDAELHKEEDKQRKEASDVKNEADGMI FRAEKAVKDYHDK-----IPAEI  
 PQIEVTFDDIDANGILNVSADKATGKEQSIKIEASGKLTAEIEKMKEDAKAHAEDQKRKEEIELKNSADSLIFSTEKQLTELGDK-----LPADK  
 PQIEVTFDDIDANGIVNVSADKGTGKESHITITASTNLSDEEIDKAVKDAEKFAEEDKRRKKEIEVKNADQIVFQTDKALKDLGDK-----VSAED  
 PQIEVTFDDIDANGIVNVSADKDKTGTGKEANITITASTNLSDEEIEKAVNDAEKFAEEDKRRKESIEIKNNADQIVYQTEKTLTDLGDK-----VSAED  
 PQIEVTFDDIDANGIVHVTAKDKGTGKENTITITQDGSGLSQDEIDRMKIDAEAAHAEEDKRRREEQEVNNAESLVYQTRKFEVENSEK-----VSEDL  
 PQIEVTFDDIDANGILHVSADKATGKEQSIKIVIKASSGLSDEEVEKMKVDAEAHRDSDRKFHELVDARNQADAMIHAAEKSVKDLGSE-----VSADE  
 AQIEVTFDDIDANGILHVTAKDKTGTGKESSITIENTTTLDKTDVERMVQEAEQNAADKQRKEKVEKRNLDLSLRVQAVQQLEEQEGA-----AQDA  
 PQIEVFSFDIDANGIVNVAADLGTGKEQSIQIRITASSGLSEDEIQRVKEAEAAHADDKQKQELIERNQADGLIYGTESIRDLGDK-----LDAAL  
 PQIEVTFDDIDVNGIVHVSADKATGREQRITISNAIRLSEAEIKRMTEEAARFEEEDRKRREIEIETKNQAEHLIYTARKTLKDYGDK-----VSKDI  
 PQIEVFSFDIDKNGIVNVRADLGTGKEQKITIKSSSGLNDEEIERMVKDAEANAADKQRKEEVDLRNADALLFTVDKTLKELEGK-----VDAEE  
 PQIEVTFDDIDADGILHVSADKDKNSGKEQKITIKASSGLNDEEIQKMRVDAEANAADKRFEEELVQTRNQGDLHLHSTRKQVEEAGDK-----LPADD  
 PQIEVAFDDIDANGIIKVSATDKGTGKSHDIRIEASSGLTSEIEERMKDAEANAAGADKIARERVEKINEADSLIFQTEQTLKELGDK-----ITDEH  
 PQIEVTFDDIDANGILNVSADKATGKEQNIKIVIKSSSGLSEDEIEKMQVDAEANAADKRFHDLVTRNTADNLIHSSRKAIQELGDK-----VTAAE  
 PQIEVTFDDIDANGIVHVSADLGTGKENKVTISGSSNLSKEEIERMTKEAEAAHEEDKRFQELVEARNKADQLISATEKTLKENPDK-----VSEED  
 PQIEVTFDDIDANGIVHVSADLGTGKEQSIQIRITASSGLSKEEIDKMKVKEAEAAHAEEDKRRRELVEARNHADTLSYSTEKSLKEYGDK-----IGADE  
 PQVEVTFDDIDANGILSVTAKDKASGKAQTISITGASTLSKDDVQKMNVAEASFAGEDKRRREAVDLKNEADSLAQAEERQLTEFGDK-----VDSSD  
 PQIEVTFDDIDANGIVNVSADKDKNTGKEQKIRIQASSGLSDEEIQMVVDAEANAADKRFEEVAVQARNQADGLIAHATRKQIAEAGDA-----LSVAD  
 PQIEVTFDDIDANGILTVSAQDKNTGKSQEIKISGSSGLSDSEIEKMKVDAELHKEEDAKKKEVIEARNHADS LAHQTKQSLDEHKTN-----LNEND  
 PQIEVTFDDIDANGILNVTAKDNATGKDQKITITSSSGLSKEEIVERMAKEDAHAADKAKKKEIEARNQLDGMVYQIEKMLKENGDK-----ISPSE  
 PQIEVKFDIDKNGIVNVSADKMTNKEQKITIKSSSGLSDEEIQDMVKEAKNEEADKRRKEEVDLKNVDQLIFTTDKTLKDLGDK-----VSEDE  
 PQIEVTFDDIDKNGIVSVKAKDLGTQKEQTVIKSNSGLSDEEIDKMMKDAEANAADAKRRKEEVDTRNEADALVFQTEKTLKDLGDK-----VEEAE  
 PQIEVTFDDIDANGIVHVSADLGTGKEQKIRIESSSGLSEDEIQKMKVDAEANAADKQREVIKNELDLTLTYSLEKTVNEAGDK-----IGANE  
 PQIEVFSFDIDKNGIVTVRAKDLGTGKEQNIKIVIKSSSGLTDEEIEKMKVDAEANAADKRRKKEEAEARNADQLVFTVDKTLKELEGK-----VEEEE  
 PQIEVTFKIDVNGIVSVIAKDKATNEEKSTISNSGALSADIEKMKIEAEANAADKRRKELKRNIEELKHKAESYVAIESSLTQEGQE-----IPQEQ  
 PQIEVKFDIDANGIVHVSADLGTGKQQAITITSSSGLSEEEIQRMVKEAEASAEADRRRKEEIEETRNQADS LIYQAERTLKEFKDK-----ADQND  
 PQIEVTFDDIDANGIVHVTAKDKGTGKENTIKIQEGSGLSKEEIDRMKIDAEAAHEEDRKRREEDVRNQAESLVYQTEKQVAEQGAASDGGGSKVPEET  
 PQIEVTFDDIDANGIVHVTAKDKGTGKENTIRIQEGSGLSKEEIDRMKIDAEAAHEEDRKRREEDVRNQAE TLVYQTEKQVKEQREA---EGGSKVPEDT  
 PQIEVTFEIDANGIVSVSADKNTNEEKTITISNSGNLSEAEVERMIKAEQENAANDEVKKNIELKNKAENYINIIENSLLQAGDK-----ISAEQ  
 PQIEITFSLDANGILNVAKDLTTQKENSITISDNGLSKEEIQKMRDAEANKERDNVIRELIERLNEGESIVSTIKEILQSPEAK-----DFPKEE  
 PQIEVTFDDIDANGILHVSADKDKGTGKAANITIQGSSGLSEEEIERMVKDAEANAEDKKTTELVSARNQAEALIHVSVKKSLADYGDK-----LDAAE  
 PQIEVTFDDIDANGILHVSADKDKGTGKAANITIQGSSGLSEEEIERMVKDAEANAEDKKTTELVSARNQAEALIHVSVKKSLADYGDK-----LDAAE  
 PQIEVTFDDIDANGILHVSADKATGKQQSIVIKASSGLSEDEIQQMVRDAEANAEDRKFEEELAAARNQGDALVHATRKMI TEAGDK-----ATAED  
 PQIEVTFDDIDANGIVSVSADKDKGTGKSQNIITIQASGGLSDEEIEKMRVDAEANAADKRRRELVEETKNQGESLLHSTRKSLIEHGDK-----VDPST  
 PQIEVKFDIDQNGILSVSAKELKLTGKEANVEIKDSGALSDDIEIQMQKDAEANAEDKRFQELVEARNKVNQVYQLEKLMGENDDK-----LSDDD  
 PQIEVTFDDIDANGIVNVSADKATGKEQAIQIRIQASGGLSDNDIERMVKDAELNAAEDRKRKEAVEARNHADGLIHATEKNLKEYGDK-----IPAED  
 PQIEVTFDDIDANGIVHVSADKASGKEQKVTIQASGGLSDAEIEQMVKDAEANAEDKRRKELIETKNAADS LVYSTEKTLREYGDK-----LSSEE  
 PQIEVTFDINADGILNVAEDKDTGKEQSIQIRVEANSGLSDEEIEKMKEEAEQHAEEEDRKRERADTINEANSMAYSVEQGLEEYGDK-----IPEDK  
 PQIEVTFDDIDADGILHVSADKDKNSGKEQKITIKASSGLNEEIEQKMRVDAEANAESDRKFEEELVQTRNQGDLHLHSTRKQVEEAGDK-----LPADD  
 PQIEVTFDDIDADGILHVSATDKKTKGKQNIITIKASSGLSEEEVQKMRVDAEAAHEEDKRFEEELVQSRNQADGLVHATKKQVEEAGDA-----LPSED  
 PQIEVTFDDIDADGILHVSADKDKNSGKEQKITIKASSGLNEDEIQKMRVDAEANAADKRFEEELVQTRNQGDLHLHSTRKQVEEAGDK-----LPADD  
 PQIEVTFDDIDKNGIVNVTAKDLGTNKEQRITIQSSSSLSDEEIDRMVDAEVNAEADKRRREEVDLRNEADSLVFQVEKTLTDLGEN-----IGEED  
 PQIEVTFDDIDKNGIVSVKAKDLGTQKEQTVIQSNGSLTDEEIDRMKDAEANAADKRRKEEVDLRNEVDQAI FATEKTIKETEKG-----GFDAE  
 PQIEVAFDDIDANGIMHVTAKDLGTGKEQKMTVTGGSSGLPKDEVDRMRQEAKEYAEDLGTREAEVSRNQGEQLVYQTEKFLNENKNDK-----VPGEV  
 PQIEVTFDDIDANGILNVTAKDRGTGKEQSIQITGASTLPDTEVDRMVKEAESNAADKRREREKIDRNQADS LVYQAEKQITELGDK-----VPAAD  
 PQIEVTFDDIDANGILHVSADKDLATGKEQSIQIRITASSGLSEEEIKKMIREAEAAHEEDRKRKQIAEARNEADNMIYTVKTLRDMGDR-----ISEDE  
 PQIEVTFDDIDSGIVHVSADKLGSGKEQSMVVTGRHKLSEDEIKRMIEDAKRYEEQDKRLKEEIELKNRADDLAYSVEKTLKEHGDK-----IPADL  
 PQIEVCFDDIDANGILHVTAKERSTGREASITIQNTTTLSEEEIQRIIEEAKRHAEEEDRRRREHAEKLNALDSARVQAEERVLQERQGA-----PE-A  
 PQIEVIFDLDADGILHVSADKDKTGTGKEQKITIQASGGLSDAEIEKMQVDAEANKAEADKRFEEELATARNQADQMIHATRKQITEAGEA-----LPADE  
 PQVEVFSFDIDANGILHVSADKDKTNEKQKVEIKAGSGLSDEEIQRMVDAEANAEDKRFQELVQTRNQADGLIHATRTAITTEHGSK-----VGGDV  
 AQIEVTFDDIDADGILHVSADKDKNTGREQKITIKASSGLNEEIEQKMRVDAEANAADKRFEEELVQTRNQADHLLHSTRKQLEEAGDK-----LPAED

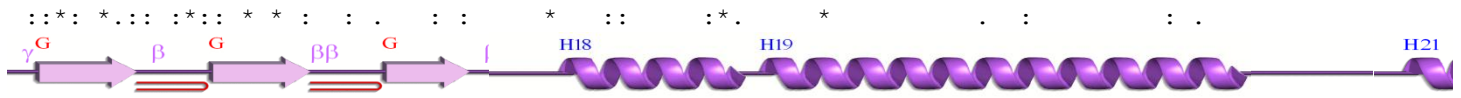



Acinetobacter\_baumannii  
 Agrobacterium\_tumefaciens  
 Aquifex\_aeolicus  
 Bacillus\_anthraxis  
 Bacillus\_cereus  
 Bacillus\_subtilis  
 Bacteroides\_thetaiotaomicron  
 Bifidobacterium\_longum  
 Bordetella\_pertussis  
 Borrelia\_burgdorferi  
 Bradyrhizobium\_japonicum  
 Buchnera\_aphidicola  
 Burkholderia\_pseudomallei  
 Campylobacter\_jejuni  
 Caulobacter\_crescentus  
 Chlamydia\_trachomatis  
 Chlorobium\_tepidum  
 Clostridium\_acetobutylicum  
 Clostridium\_botulinum  
 Corynebacterium\_glutamicum  
 Coxiella\_burnetii  
 Deinococcus\_radiodurans  
 Desulfovibrio\_vulgaris  
 Dictyoglomus\_turgidum  
 Enterococcus\_faecalis  
 Escherichia\_coli  
 Flavobacterium\_psychrophilum  
 Francisella\_tularensis  
 Fusobacterium\_nucleatum  
 Geobacter\_sulfurreducens  
 Gloebacter\_violaceus  
 Haemophilus\_influenzae  
 Helicobacter\_pylori  
 Koribacter\_versatilis  
 Lactobacillus\_plantarum  
 Lactococcus\_lactis  
 Leptospira\_interrogans  
 Listeria\_monocytogenes  
 Mesoplasma\_florum  
 Moorella\_thermoacetica  
 Mycobacterium\_smegmatis  
 Mycobacterium\_tuberculosis  
 Mycoplasma\_mycoides  
 Mycoplasma\_pneumoniae  
 Neisseria\_gonorrhoeae  
 Neisseria\_meningitidis  
 Pseudomonas\_aeruginosa  
 Rhodobacter\_sphaeroides  
 Rhodopirellula\_baltica  
 Rhodospirillum\_rubrum  
 Rickettsia\_prowazekii  
 Salinibacter\_ruber  
 Salmonella\_typhimurium  
 Shewanella\_oneidensis  
 Shigella\_dysenteriae  
 Staphylococcus\_aureus  
 Streptococcus\_pneumoniae  
 Streptomyces\_coelicolor  
 Synechocystis\_sp.  
 Thermodesulfovibrio\_yellowstonii  
 Thermotoga\_maritima  
 Thermus\_thermophilus  
 Vibrio\_cholerae  
 Xanthomonas\_campestris  
 Yersinia\_pestis

KTAVNTAVSELEAATKE---N--DVEAIKAKTEALQNIIMPITQRAYEQAAQGGGAEGF---DPN-----AFQGGDAGQQKADD  
 RKAIEDIAIASLKTAVEA--AEP--DADDIQAKTQTLMEVSMKLGQAIYEAAQAEAGDASA-----EGKD  
 KSEAEKVIEEAKKTIIETAT-----EIEQVKQVTEKVLQVS--SKMGT---TLYGEA--GK-----QAGGGEKKD  
 VAKATEAKEALQAAIEK---N--ELEEIRAKKDALQEIVQQLTVKLYEQAAAAGQAE--AEGA-----QDAGAKKD  
 VAKATEAKEALQAAIEK---N--ELEEIRAKKDALQEIVQQLTVKLYEQAAAAGQAE--AQGA-----QDAGAKKD  
 VKKANDAKDALKAAIEK---N--EFEEIKAKKDELQTIIVQELSMKLYEBAKAQQA-----QGGA-----NAEGKADD  
 KAPIEAAALQKLG---DAHKSQ--DLAAIDTAMAEINTVFQTSASEMYAQQGAQGG--AQA-----GPDMDAGQNAAGQD-----NSKHGD  
 VKEVTDKVNALKEALKG---D--DTEKVKTAQTELMTAAQKIGQVLYAQQGAEGAAAGAD-----G-----AGASA--GSASGSDD  
 KESIEAAIKDLEDILKT---G--DKAEIDAKVEALSTASQKLGEKMYADMQAQQQAQQQA-----ADNAKPVDD  
 KEAIESKIKELKESLEK---E--DISLIKSRTEELQKASYKIAEMMYKDSQQNANSQQEN--G-----PQSNTSE  
 RRAIEDAVSDLKEALKG---D--DAEAIKAKTQTLAQASMKLGEAMYKQA--EADAKKD---AAK  
 KKDIQLALNKLENALKG---E--DKSDIEKNIQNLKISSKLTETINQKSEKQDK-----DNNMSANKKDE  
 KEKIEAALKELEDVLKN---ASS--DKAAIDAKVEAVTASQKLGEKMYADMQAQQGAAGAA--GAA-----AEGASAQGGQAPAD  
 KENIQKALDDLRETLKN--QNA--SKEEIESKMKALSEVSHKLAENMYKKDEPNTA-----NDKKKKDD  
 KTAIETGITELKTALEG---E--DVEAIQAKTQALIQASMKLGEAMYAAQQGSAAEGGD-----AKADD  
 VKEIEEHIKVRQAIKE--D-A--STTAIKKASDELSTHMOKIGEAMQAQSSAAASSAANAQGGPNINSEDLK-----KHSFSTRPPAGGSASSTD  
 KAAIESALEKLG---EAHKSQ--RVDAIKPAMDELSKVVSDAASNLYGQPGAEPQ--PET-----N-----GHAG-----GSKGGD  
 KSNIEAKKEALSKVKDG---D--DIEAIKKAATEDLTQALYAITTKMYEQSGAQGAP--GADP-----NAGASQKTNGGADD  
 KAQIEEKVAVKDVKDG---E--DLEAIKKAATEDLTQTFYIGISSKIYQANPEGAQ--GAGFD--PNN-----MGGA-----NAGNASAGNDKKDD  
 KAKVEEAAKGVVEALKG---E--DLEAIKAAVEKLNTESEQEMGKAIYEADAAAGATQA-----DAGAEGAADD  
 KSAIEKAVNELKEAMKG---N--DKDAIEAKTKALTEHSSKLAERVYAKKGAAGAPP--GE-----AEGEPQAQAGGKKE  
 KDRLKAAADEAEEAVRSE-----DDSKIADAQKKLEELRFSMTANQASTQGPPE--GT-----QAQANKADD  
 KADIETKVTALRGLLES---E--DVDAIKKASDELAQASHKLAEQLYKQQAQAGGPEGAQ--PEG-----DAGARKQDD  
 VQKVEDKIKNLEELIKP---ERINVEQVRKGMELTQTLGELIGQFMYQSAGSTAGNPGQGGQ--TEN-----PGG  
 VKKAEDARDELKAAIEA---N--DIEQMKAKRDSLNEIVQNLTVKLYEQAAQQAQENP-----EAAQGGAD  
 KTAIESALTALETALKG---E--DKAAIEAKMQELAQVVSQKLMEIAQQQHAQQQT-----AG--ADASANNKDD  
 KTAIEYALTELR---MAHQSQ--DLEAIQKGLDNVNAAWKTATEAMYAQGEQGGQ--A-----QPQ-----AETQGD  
 KEKIEEACKLEAATKG---D--DKQAIESKTKALEEAFAPIAQKAYAEQAQAAVAQ-----GGAKEEPPKKEE  
 KKNIEAAIEELKVKDG---D--DKSAIDSAAMEKLSQASHKFAEELYKEVQAQQA--QQ-----QAGA-----NAGSDKKDEDVAEA  
 KAKIEECLANLRKAMEG---S--DVEVLKKADELTAQASHKLAEEVYAKAQAEGAQPGG---EA-----AGEASAKDE  
 KSKIEGLIKDLREALSR---E--DMDKVASLKADLQAVYDLSSKLYQSSAPSGAAAGP-----DEGA-----PSGSGTSGTRGGD  
 KEKIEAAVAELETAAG---E--DKAEIEAKIEAVIKASEPLMQAVQAKAQAGG---EOPFQQSSAKDD  
 ANEQNAINALKDCVKN---DNA--TKAELEDKTKLLAQAAQKLGEAMANKN---NA-----EQPKKKDD  
 RGDVENALADSKKALET---N--DAKQMNAAERLTAASHKLAEEVYAKAQAAGAPGAP--GPEAA-----GGAQQAQAEPPKDE  
 VKKAKDARDALKKAQDD---N--NIDEMKAKKDDLNKIVQDLSVKLYQQAQEAQGAQGG-----ADSN-----AAGN--ANSAGSDD  
 VKKAAEEAKEELKKALEG---E--DIDDIKAKSEALSEIAQNLAVKLYEQANAAQGEAGQ-----ATDA-----Q--EAPKDD  
 KQLATDEIKRAREAIES---N--DKARIESAKASISKIATDIASKVYSQSPAGAEQAAAGG--PNG--S-----AGSNDQGNSTNNGE  
 VKKAAEARDELQELKLG---E--DFDAIKEKTESLNEIVQNLVSVKLYEQAAAEQAAAGG---AEGQ-----E--APQND  
 KEQAEKMAEVKELIEK---E--DYEALETKVNELQMIQMASQFAQAQTAQPEEGNSD--S--EEN-----K-----  
 VDRIEKAKKELQEVLDSD---K--NNDKIKEKMEALSQALYTLTTKVYQQAQAGA-----QGQGAAGGQKQDG  
 LAKVDSAIADAKKALEG---T--DISAIKSAMEKLGVESQALGQAIYEATQAEQPPAGGSD-----NGAPG--DD  
 LNKVDAVAEAKAALGG---S--DISAIKSAMEKLGQESQALGQAIYEAQAASQATGAA-----H-----PGGPEGGAHPGSAD  
 KEQSQKMVDEIKELVKN---E--NYEALQKMAELEQAMAQAAEFANKQNESDPNNSS--E--QNN-----  
 KEKLDKITGGIDAAIKA---N--DYTKLKAETENFKKWRREEMAKK--YNPNDGQGGPAQ-----  
 KEKIEAALKEAEEAVKG---D--DKTAIDAKAEALGTASQKLGEMVYAQAQAEQA-----GEGAQANASAKKDD  
 KEKIEAALKEAEEAVKG---D--DKAAIDAKTEALGAASQKLGEMVYAQAQAEQA-----GESEQANASAKKDD  
 KATIEKALGELEAVKG---D--DKAEIEAKMNALSQASTPLAQKMYAEQAQGE-----DAPQGEQAKAAD  
 VEAIELAMGALBEALKS---E--DAGKIKGGIQLNTEAMRLGEAIYKASQAEGGATPD--E-----EGPRSVDD  
 KAPMNAIEKVKKAAEG---D--DLAEIKKASDELEAASQAFSKVLYEKTDAAAGEAGD-----A-----AGAAGATAGGGDD  
 KAKVEGLDTALKAVLDS---E--DAESIKAKTDALMQSAMKLGAAAYSAGQSAEGAPHA--A--GAE-----ASAQSRDDD  
 KGTVEEALTSLKAALS---E--DASLIKEKTGNLTANMKIGEAMYKTQTNQHS-----EANTVNE  
 RSTLQEALDALNEELETASADE--DITALEDALEELNAAWSAAGEEIREAQQQQAQGAAGAGA--GAAGAGAAAGAEGPAGGPTGGPASNGAADSDEE  
 KTAIESALNALETALKG---E--DKAAIEAKMQELAQVVSQKLMEIAQQQHAQQQA-----GS--ADASANNKDD  
 KAKIEAAMSAVETAVKG---N--DKEAIEKATQALIEASAKLMEIAQAKAQTTGG-----AQEGAQKSNATAD  
 KTAIESALTALETALKG---E--DKAAIEAKMQELAQVVSQKLMEIAQQQHAQQQT-----AG--ADASANNKDD  
 KKSAAEKKDALKTALEG---Q--DIEDIKSKKEELEKVIQELSAKVYEQAQQQQQAQ--A-----NAGQNNDS  
 RDAAQAALDDLKKAQED---N--NLDDMKAKLEALNEKAQGLAVKLYEQAAAQQAQEG---AEGA-----QATGNAGD  
 KTEVESAVAELEKELKLG---E--DTAEIRTAQEKVAVVSQKLGQAMYADAQAAQAGG--E-----A-----PGDAGAEGKGAADD  
 KIKAEGLIKDLKEAVAQ---E--DDAKIQTVMPQLQVLYSISGNMYQQAQAEAGVGA--GAGP-----EAG-----TSSGGGD  
 RKRIEAAIEKCRRIK--D--TSN--DVNEIKAAVEELAKASHRVAEELYKKGASQGGAG---STTQSKKEE  
 KSRLEDMIRELRDAINR---N--DIPKVKMLFDDLQKESMKIGEYLYKSATGGGETSNQ-----QAASGKGPD  
 RARLEAAIGKAKELVERDA---PDPELKAATEELL-----KAVEEYK--GA-----G--ANAGQSSAKED  
 KAKIETAINLELTAKKG---E--DKAEIDAKVQALMAAAQKLMEIAQQQAQ--A-----DAASGNAQASKAAD  
 IGKVEAALADLETAMKG---D--DKAQIEARSKTLEEAGQSLYAAAAAEEQGN-----A-----G--DAGDTSAKKED  
 KTAIEEAMKGLEAALKG---E--DKAEIEAKTQALVQVSGKLEMAQQQQAAG--G-----G--DAGDTSAKKED

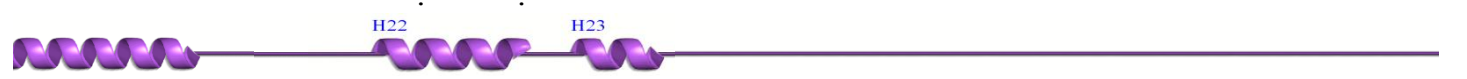

|                                  |                       |
|----------------------------------|-----------------------|
| Acinetobacter_baumannii          | GV--VDAEFTEVKDDKK---  |
| Agrobacterium_tumefaciens        | DV--VDADYEEKDDKSA-    |
| Aquifex_aeolicus                 | EGGEGEVEAKPVD-----    |
| Bacillus_anthraxis               | NV--VDAEFEEVKEDK----  |
| Bacillus_cereus                  | NV--VDAEFEEVKEDK----  |
| Bacillus_subtilis                | NV--VDAEYEEVNDDQNK-   |
| Bacteroides_thetaiotaomicron     | NV--QDAEFEEVK-----    |
| Bifidobacterium_longum           | DT--VEAEVVDVDDDDKDNK- |
| Bordetella_pertussis             | NV--VDADFKEVKRDQ----  |
| Borrelia_burgdorferi             | EG--KEADYEVVDEDDK---  |
| Bradyrhizobium_japonicum         | DV--VDAEFTEVDDDKNNKK  |
| Buchnera_aphidicola              | NV--VDAEFEEIKDPKK---- |
| Burkholderia_pseudomallei        | DV--VDADFKEVKKD-----  |
| Campylobacter_jejuni             | DV--IDAEVE-----       |
| Caulobacter_crescentus           | GV--VDAEFEEVDDNKPAA-  |
| Chlamydia_trachomatis            | NI--EDADVEIVDKPE----  |
| Chlorobium_tepidum               | GA--VNAEYEVIDGDDK---  |
| Clostridium_acetobutylicum       | NV--VDADFKVDNDK-----  |
| Clostridium_botulinum            | NV--VDADFKVEDDK-----  |
| Corynebacterium_glutamicum       | NV--VDAEVVEDDAADNGED  |
| Coxiella_burnetii                | DV--VDAEFEEVKDEKKKDE  |
| Deinococcus_radiodurans          | DV--IDADFKPAE-----    |
| Desulfovibrio_vulgaris           | DV--VDADYTEVVK-----   |
| Dictyoglomus_turgidum            | KT--IDGDYKVN-----     |
| Enterococcus_faecalis            | DV--VDADFEEVNGDDK---- |
| Escherichia_coli                 | DV--VDAEFEEVKDKK----  |
| Flavobacterium_psychrophilum     | DV--QDVEFEEVK-----    |
| Francisella_tularensis           | DV--VDADFEDVEDDKK---- |
| Fusobacterium_nucleatum          | EV--VD-----           |
| Geobacter_sulfurreducens         | KV--VDADFEEVKDDKK---- |
| Gloeobacter_violaceus            | DV--IDAEFTEK-----     |
| Haemophilus_influenzae           | GV--VDAEFEEVKDNK----  |
| Helicobacter_pylori              | DV--IDAEVE-----       |
| Koribacter_versatilis            | GV--IDAEYVDVDEKK----  |
| Lactobacillus_plantarum          | NT--VDGDFEDLDKDKDKK-  |
| Lactococcus_lactis               | NT--FDGDFEESK-----    |
| Leptospira_interrogans           | KV--VDADYTVVDDEKK---- |
| Listeria_monocytogenes           | DV--VDAEFEEVNDDDKENK  |
| Mesoplasma_florum                | -----                 |
| Moorella_thermoacetica           | NV--YDADYKVVDDDKKE--  |
| Mycobacterium_smegmatis          | NV--VDAEVVDDDAGKENK-  |
| Mycobacterium_tuberculosis       | DV--VDAEVVDDGREAK---- |
| Mycoplasma_mycoides              | -----                 |
| Mycoplasma_pneumoniae            | -----                 |
| Neisseria_gonorrhoeae            | DV--VDADFEEVKDDKK---- |
| Neisseria_meningitidis           | DV--VDADFEEVKDDKK---- |
| Pseudomonas_aeruginosa           | DV--VDAEFEEVKDNK----  |
| Rhodobacter_sphaeroides          | DI--VDADFEDLGENKRR--  |
| Rhodopirellula_baltica           | DA--IDAEFEVKE-----    |
| Rhodospirillum_rubrum            | GV--VDADFEEVDEKKGH--  |
| Rickettsia_prowazekii            | KV--VDADFQDVDKK-----  |
| Salinibacter_ruber               | DV--QDADYEVVDEGDDE--  |
| Salmonella_typhimurium           | DV--VDAEFEEVKDKK----  |
| Shewanella_oneidensis            | DV--VDAEFEEVKDDKK---- |
| Shigella_dysenteriae             | DV--VDAEFEEVKDKK----  |
| Staphylococcus_aureus            | TV--EDAEFKEVKDDDKK--  |
| Streptococcus_pneumoniae         | DV--VDGEFTEK-----     |
| Streptomyces_coelicolor          | DV--VDAEIVDDERKDGAA-  |
| Synechocystis_sp.                | DV--IDAEFSEPEK-----   |
| Thermodesulfovibrio_yellowstonii | DV--IEAEVEDKDNK-----  |
| Thermotoga_maritima              | -----                 |
| Thermus_thermophilus             | DV--IDADYKPAD-----    |
| Vibrio_cholerae                  | DV--VDAEFEEVNDDKK---- |
| Xanthomonas_campestris           | DV--VDAEFTEVKDDKKA--  |
| Yersinia_pestis                  | DV--VDAEFEEVKDKK----  |

---
